# Supplementary material for: Reduction of EpCAM-Positive Cells from a Cell Salvage Product Is Achieved by Leucocyte Depletion Filters Alone
Source: MDPI journal article supplement (doi:10.3390/jcm12124088), 2023-06-16
Supplement: s1 [file s1]

## Supplementary Information

# Reduction of EpCAM-Positive Cells from a Cell Salvage Product Is Achieved by Leucocyte Depletion Filters Alone

Lucia Merolle <sup>1</sup>, Davide Schioli <sup>1\*</sup>, Daniela Farioli <sup>1</sup>, Agnese Razzoli <sup>1,2</sup>, Gaia Gavioli <sup>1,2</sup>, Mauro Iori <sup>3</sup>, Vando Piccagli <sup>3</sup>, Daniele Lambertini <sup>3</sup>, Maria Chiara Bassi <sup>4</sup>, Roberto Baricchi <sup>1</sup> and Chiara Marraccini <sup>1</sup>

<sup>1</sup> Transfusion Medicine Unit, Azienda USL-IRCCS di Reggio Emilia, 42123 Reggio Emilia, Italy

<sup>2</sup> Clinical and Experimental Medicine PhD Program, University of Modena and Reggio Emilia, 41125 Modena, Italy

<sup>3</sup> Medical Physics Unit, Azienda USL—IRCCS di Reggio Emilia, 42123 Reggio Emilia, Italy

<sup>4</sup> Medical Library, Azienda USL—IRCCS di Reggio Emilia AUSL-IRCCS di Reggio Emilia, 42123 Reggio Emilia, Italy

\* Correspondence: [davide.schioli@ausl.re.it](mailto:davide.schioli@ausl.re.it); Tel.: +39-0522-295057

## Supplementary Materials and Methods

### Literature Review

A bibliographic search was carried out on the MEDLINE, Embase and Scopus databases from 2012 to 2022. A search string containing the following terms and limits was generated: (((“Salvage Therapy”[MeSH] OR “Operative Blood Salvage”[Mesh] OR cell salvage[Title/Abstract] OR blood salvage[Title/Abstract]) AND ((“Neoplasms”[Mesh] OR cancer[Title/Abstract] OR tumor[Title/Abstract] OR neoplasm[Title/Abstract] OR oncol\*[Title/Abstract]))) AND ((filtration[title/abstract] OR leukocyte depletion[title/abstract] OR LDF[title/abstract])) OR (((“Salvage Therapy”[MeSH] OR “Operative Blood Salvage”[Mesh] OR cell salvage[Title/Abstract] OR blood salvage[Title/Abstract]) AND ((“Neoplasms”[Mesh] OR cancer[Title/Abstract] OR tumor[Title/Abstract] OR neoplasm[Title/Abstract] OR oncol\*[Title/Abstract]))) AND (irradiation[title/abstract])). A consultation of the Italian regulations, SIMTI national guidelines and the European Directorate for the Quality of Medicines & HealthCare (EDQM) was also carried out.

### Results of the literature review

The bibliographic search was focused on the scientific literature published in the last 10 years (since 2013) and concerning cell salvage studies in cancer that included a filtration and/or irradiation step. In our search we excluded all the literature that did not assess at least one of these steps. The string reported the presence of 403 articles pertaining to our research question, with 333 articles from PubMed, 59 from Embase, 62 from Cochrane and 46 from Scopus (see PRISMA flow diagram in

Figure SI of the Supplementary Information). Eight reviews were identified and discussed separately. After duplicates removal, sorting for relevance and abstracts/posters exclusion, the full-text articles published in the last 10 years and included in our review were only 20: of these, 7 were clinical (mainly retrospective) and 13 were in vitro/ex vivo studies.

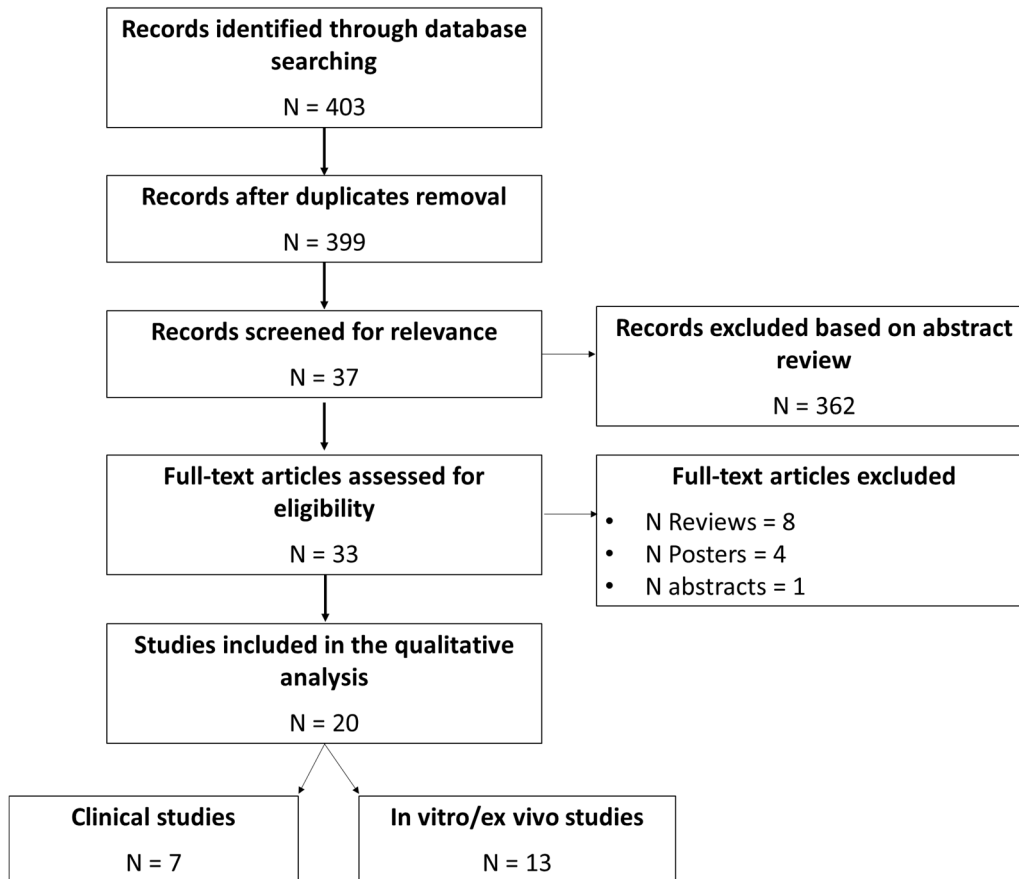

**Figure S1. PRISMA flow diagram of the literature revision.** Records were identified according to the string detailed in Materials and Methods section.

## SUPPLEMENTARY TABLES

**Table S1. Clinical and in vitro/ex vivo studies on cell salvage plus filtration and/or irradiation in cancer surgery published since 2013:**

| Author                      | Year | Journal             | DOI                                | Study type | Diagnosis               | N subjects | Control group | Treatment             | N control | N treated |
|-----------------------------|------|---------------------|------------------------------------|------------|-------------------------|------------|---------------|-----------------------|-----------|-----------|
| Gakhar H. et al. [1]        | 2013 | Asian Spine Journal | 10.4184/asj.2013.7.3.167           | clinical   | metastatic spine tumor  | 10         | none          | CS+LD                 | none      | 10        |
| Kim J.M. et al. [2]         | 2013 | Transpl Int         | 10.1111/tri.12001                  | clinical   | hepatocarcinoma         | 109        | AT            | CS+LD                 | 109       | 121       |
| Han S. et al. [3]           | 2016 | Ann Surg            | 10.1097/SLA.0000000000001486       | clinical   | hepatocarcinoma         | 319        | no CS         | CS+LD                 | 97        | 222       |
| Elmalky M. et al. [4]       | 2017 | Spine J             | 10.1016/j.spinee.2017.03.004       | clinical   | metastatic spine tumor  | 176        | no CS         | CS+LD                 | 113       | 63        |
| Myrga J.M. et al. [5]       | 2020 | Urology             | 10.1016/j.urology.2019.08.056      | clinical   | prostate cancer         | 157        | no CS         | CS+LD                 | 70        | 87        |
| Rajasekaran R.B. et al. [6] | 2021 | J Bone Oncol        | 10.1016/j.jbo.2021.100390          | clinical   | musculoskeletal sarcoma | 109        | none          | CS+LD                 | none      | 102       |
| Weller A. et al. [7]        | 2021 | Transplant Proc     | 10.1016/j.transproceed.2021.03.025 | clinical   | hepatocarcinoma         | 51         | no CS         | CS or CS+IRR          | 12        | 11 + 28   |
| Kumar N. et al. [8]         | 2014 | Ann Surg Oncol      | 10.1245/s10434-014-3569-x          | ex vivo    | metastatic spine tumour | 24         | CS            | CS+LD                 | 24        | 24        |
| Kumar N. et al. [9]         | 2014 | Ann Surg Oncol      | 10.1245/s10434-014-3950-9          | ex vivo    | metastatic spine tumour | 11         | CS            | CS+LD                 | 11        | 11        |
| Kumar N. et al. [10]        | 2016 | Eur Spine J         | 10.1007/s00586-015-4112-x          | ex vivo    | metastatic spine tumour | 50         | CS            | CS+LD                 | 50        | 50        |
| Kumar N. et al. [11]        | 2016 | Eur Spine J         | 10.1007/s00586-016-4478-4          | ex vivo    | metastatic spine tumour | 12         | CS            | CS+LD                 | 12        | 12        |
| Tan J.K.H. et al. [12]      | 2021 | HPB (Oxford)        | 10.1016/j.hpb.2021.04.006          | ex vivo    | hepatocarcinoma         | 15         | CS            | CS+LD                 | 15        | 15        |
| Winter A. et al. [13]       | 2021 | BMC Anesthesiol     | 10.1186/s12871-021-01479-3         | ex vivo    | cancer                  | 16         | LD            | Catuvab <sup>TM</sup> | 16        | 16        |
| Zhang X. et al. [14]        | 2021 | BMC Urol            | 10.1186/s12894-021-00803-w         | ex vivo    | renal cell carcinoma    | 5          | CS            | CS+LD                 | 5         | 5         |
| Zong Y.N. et al. [15]       | 2022 | BMC Anesthesiol     | 10.1186/s12871-022-01743-0         | ex vivo    | metastatic spine tumour | 20         | CS+LR         | CS+LD                 | 12        | 8         |

|                           |     |               |                              |          |                   |    |           |              |    |    |
|---------------------------|-----|---------------|------------------------------|----------|-------------------|----|-----------|--------------|----|----|
|                           | 201 |               | 10.1371/journal.pone.0127181 |          |                   |    |           |              |    |    |
| Gong M. et al. [16]       | 5   | PLoS One      |                              | in vitro | cancer cell lines | 14 | no IRR    | IRR          | 14 | 14 |
|                           | 201 |               | 10.1371/journal.pone.0130864 |          | HepG2 and primary |    |           |              |    |    |
| Mei K. et al. [17]        | 5   | PLoS One      |                              | in vitro | cells             | 30 | CS+LR     | CS+LD        | 30 | 30 |
| Marraccini C. et al. [18] | 201 |               | 10.1111/vox.12565            |          |                   |    |           |              |    |    |
|                           | 7   | Vox Sanguinis |                              | in vitro | HCT116 cell line  | 10 | CS        | CS+LD        | 10 | 10 |
|                           | 201 |               | 10.1038/s41598-017-08405-z   |          |                   |    |           |              |    |    |
| Zhang F.J. et al. [19]    | 7   | Sci Rep       |                              | in vitro | HCC cell lines    | 14 | IRR 30 Gy | IRR 50 Gy    | 14 | 14 |
|                           | 201 |               | 10.1111/trf.15499            |          |                   |    |           | IRR+Riboflav |    |    |
| Yu Y. et al. [20]         | 9   | Transfusion   |                              | in vitro | HCT116 cell line  | 10 | LD        | in           | 10 | 10 |

\* CS = cell salvage; AT = allogenic transfusion; LR = leucoreduction; LD = leucodepletion; IRR = irradiation; CS+LR = cell salvage plus leucoreduction; CS+LD = cell salvage plus leucodepletion; CS+IRR = cell salvage plus irradiation

**Table S2. Reviews, systematic reviews and meta-analyses on cell salvage plus filtration and/or irradiation in cancer surgery published since 2013.** Reviews published in languages other than English were excluded:

| Author                   | Year | Journal               | DOI                           | Review type                       | Type of surgery           | Title                                                                                                                                       |
|--------------------------|------|-----------------------|-------------------------------|-----------------------------------|---------------------------|---------------------------------------------------------------------------------------------------------------------------------------------|
| Zhai B. et al. [21]      | 2013 | World J Gastroenterol | 10.3748/wjg.v19.i22.3371      | Review                            | liver transplantation     | Controversy over the use of intraoperative blood salvage autotransfusion during liver transplantation for hepatocellular carcinoma patients |
| Kumar N. et al. [22]     | 2014 | Lancet Oncol          | 10.1016/S1470-2045(13)70245-6 | Systematic review                 | spine surgery             | Use of intraoperative cell-salvage for autologous blood transfusions in metastatic spine tumour surgery: a systematic review                |
| Ferroni M.C. et al. [23] | 2017 | Rev Urol              | 10.3909/riu0721               | Review                            | urologic surgery          | The use of intraoperative cell salvage in urologic oncology                                                                                 |
| Kumar N. et al. [24]     | 2018 | Neurospine            | 10.14245/ns.1836140.070       | Review                            | spine surgery             | Current Status of the Use of Salvaged Blood in Metastatic Spine Tumour Surgery                                                              |
| Frietsch T. et al. [25]  | 2022 | Transfus Med Hemother | 10.1159/000524538             | Systematic review & meta-analysis | cancer surgery in general | Safety of Intraoperative Cell Salvage in Cancer Surgery: An Updated Meta-Analysis of the Current Literature                                 |

**Table S3.** Blood count parameters collected from in vitro cell salvage steps. Data are expressed as mean  $\pm$  SD:

|                    | HGB (g/dL) |     | HCT (%) |      | WBC ( $10^3/\mu\text{L}$ ) |     | PLT ( $10^3/\mu\text{L}$ ) |      |
|--------------------|------------|-----|---------|------|----------------------------|-----|----------------------------|------|
|                    | mean       | SD  | mean    | SD   | mean                       | SD  | mean                       | SD   |
| <b>Whole Blood</b> | 15.2       | 3.0 | 44.8    | 44.8 | 2.6                        | 0.5 | 129.8                      | 40.4 |
| <b>Reservoir</b>   | 14.4       | 2.9 | 42.6    | 8.3  | 2.2                        | 0.4 | 114.9                      | 36.6 |
| <b>Washed</b>      | 22.0       | 3.4 | 62.2    | 8.0  | 2.9                        | 1.1 | 27.3                       | 8.9  |
| <b>LD</b>          | 19.9       | 1.3 | 59.6    | 3.4  | 0.0                        | 0.0 | 0.9                        | 0.9  |
| <b>LD+IRR</b>      | 20.0       | 1.3 | 60.0    | 3.0  | 0.0                        | 0.0 | 1.3                        | 1.0  |

**Table S4.** EpCAM-positive cells counts assessed by means of flow cytometry. Data are expressed as mean cells/ L  $\pm$  SD:

|                    | CaCo-2 |     | HCT-116 |     |
|--------------------|--------|-----|---------|-----|
|                    | mean   | SD  | mean    | SD  |
| <b>Inoculation</b> | 44.3   | 4.1 | 45.6    | 6.1 |
| <b>Washed</b>      | 2.7    | 2.1 | 2.0     | 1.1 |
| <b>LD</b>          | 0.3    | 0.2 | 0.3     | 0.3 |
| <b>LD+IRR</b>      | 0.0    | 0.0 | 0.1     | 0.1 |

## References

1. Gakhar, H.; Bagouri, M.; Bommireddy, R.; Klezl, Z. Role of intraoperative red cell salvage and autologous transfusion in metastatic spine surgery: a pilot study and review of literature. *Asian Spine J.* **2013**, *7*, 167–172, doi: 10.4184/asj.2013.7.3.167.
2. Kim, J.M.; Kim, G.S.; Joh, J.W.; Suh, K.S.; Park, J.B.; Ko, J.S.; Kwon, C.H.; Yi, N.J.; Gwak, M.S.; Lee, K.W.; et al. Long-term results for living donor liver transplant recipients with hepatocellular carcinoma using intraoperative blood salvage with leukocyte depletion filter. *Transpl. Int.* **2013**, *26*, 84–89.
3. Han, S.; Kim, G.; Ko, J.S.; Sinn, D.H.; Yang, J.D.; Joh, J.W.; Lee, S.K.; Gwak, M.S. Safety of the Use of Blood Salvage and Autotransfusion During Liver Transplantation for Hepatocellular Carcinoma. *Ann Surg.* **2016**, *264*, 339–343, doi: 10.1097/SLA.0000000000001486.
4. Elmalky, M.; Yasin, N.; Rodrigues-Pinto, R.; Stephenson, J.; Carroll, C.; Smurthwaite, G. et al. The safety, efficacy, and cost-effectiveness of intraoperative cell salvage in metastatic spine tumor surgery. *Spine J.* **2017**, *17*, 977–982.
5. Myrnga, J.M.; Ayyash, O.M.; Bandari, J.; Fam, M.M.; Macleod, L.C.; Jacobs, B.L.; Davies, B.J. The Safety and Short-term Outcomes of Leukocyte Depleted Autologous Transfusions During Radical Cystectomy. *Urology* **2020**, *135*, 106–110.
6. Rajasekaran, R.B.; Palmer, A.J.R.; Whitwell, D.; Cosker, T.D.A.; Pigott, D.; Zsolt, O.; Booth, R.; Gibbons, M.R.J.P.; Carr, A. The role of intraoperative cell salvage for musculoskeletal sarcoma surgery. *J. Bone Oncol.* **2021**, *30*, 100390, doi: 10.1016/j.jbo.2021.100390.

7. Weller, A.; Seyfried, T.; Ahrens, N.; Baier-Kleinhenz, L.; Schlitt, H.J.; Peschel, G.; Graf, B.M.; Sinner, B. Cell Salvage Cell Salvage During Liver Transplantation for Hepatocellular Carcinoma: A Retrospective Analysis of Tumor Recurrence Following Irradiation of the Salvaged Blood. *Transpl. Transplant. Proc.* **2021**, *53*, 1639–1644.
8. Kumar, N.; Ahmed, Q.; Lee, V.K.M.; Chen, Y.; Zaw, A.S.; Goy, R.; Agrawal, R.V.; Dhewar, A.N.; Wong, H.K. Can There be a Place for Intraoperative Salvaged Blood in Spine Tumor Surgery? *Ann. Surg. Oncol.* **2014**, *21*, 2436–2443.
9. Kumar, N.; Lam, R.; Zaw, A.S.; Malhotra, R.; Tan, J.; Tan, G.; Setiobudi, T. Flow cytometric evaluation of the safety of in-traoperative salvaged blood filtered with leucocyte depletion filter in spine tumour surgery. *Ann. Surg. Oncol.* **2014**, *21*, 4330–4335.
10. Kumar, N.; Ahmed, Q.; Lee, V.K.; Zaw, A.S.; Goy, R.; Wong, H.K. Are we ready for the use of intraoperative salvaged blood in metastatic spine tumour surgery? *Eur. Spine J.* **2016**, *25*, 3997–4007.
11. Kumar, N.; Zaw, A.S.; Khoo, B.L.; Nandi, S.; Lai, Z.; Singh, G.; Lim, C.T.; Thiery, J.P. Intraoperative cell salvage in metastatic spine tumour surgery reduces potential for reinfusion of viable cancer cells. *Eur. Spine J.* **2016**, *25*, 4008–4015.
12. Tan, J.K.H.; Menon, N.V.; Tan, P.S.; Pan, T.L.T.; Bonney, G.K.; Shridhar, I.G.; Madhavan, K.; Lim, C.T.; Kow, A.W.C. Presence of tumor cells in intra-operative blood salvage autotransfusion samples from hepatocellular carcinoma liver transplantation: Analysis using highly sensitive microfluidics technology. *HPB* **2021**, *23*, 1700–1707.
13. Winter, A.; Zacharowski, K.; Meybohm, P.; Schnitzbauer, A.; Ruf, P.; Kellermann, C.; Lindhofer, H. Removal of EpCAM-positive tumor cells from blood collected during major oncological surgery using the Catuvab device- a pilot study. *BMC Anesthesiol.* **2021**, *21*, 261.
14. Zhang, X.; Guo, X.; Zong, Y.; Xu, C.; Wang, J.; Zhang, B.; Liu, C.; Gong, Y.; Xue, L.; Ma, L.; et al. CTCs detection from in-traoperative salvaged blood in RCC-IVC thrombus patients by negative enrichment and iFISH identification: A preliminary study. *BMC Urol.* **2021**, *21*, 89.
15. Zong, Y.-N.; Xu, C.-Y.; Gong, Y.-Q.; Zhang, X.-Q.; Zeng, H.; Liu, C.; Bin Zhang, B.; Xue, L.-X.; Guo, X.-Y.; Wei, F.; et al. Effectiveness of intraoperative cell salvage combined with a modified leucocyte depletion filter in metastatic spine tumour surgery. *BMC Anesth. Anesthesiol.* **2022**, *22*, 217.
16. Gong, M.; Yang, J.T.; Liu, Y.Q.; Tang, L.H.; Wang, Y.; Wang, L.J.; Zhang, F.-J.; Yan, M. Irradiation Can Selectively Kill Tumor Cells while Preserving Erythrocyte Viability in a Co-Culture System. *PLoS ONE* **2015**, *10*, e0127181.
17. Mei, K.; Du, L.; Yan, M.; Zhang, Z.; Zhang, F.; Gong, L.; Sun, K.; Zhang, J.; Tang, Y.; Jiang, C.; et al. Modified Leukocyte Filter Removes Tumor Cells from the Salvaged Blood. *PLoS ONE* **2015**, *10*, e0130864.
18. Marraccini, C.; Merolle, L.; Berni, P.; Boito, K.; Tamagnini, I.; Kuhn, E.; Ragazzi, M.; Baricchi, R.; Pertinhez, T.A. Safety of leucodepleted salvaged blood in oncological surgery: An in vitro model. *Vox Sang.* **2017**, *112*, 803–805.

19. Zhang, F.J.; Yang, J.T.; Tang, L.H.; Wang, W.N.; Sun, K.; Ming, Y.; Muhammad, K.G.; Zheng, Y.F.; Yan, M. Effect of X-ray irradiation on hepatocarcinoma cells and erythrocytes in salvaged blood. *Sci Rep.* **2017**, *7*, 7995.
20. Yu, Y.; Yang, L.; He, C.; Tai, S.; Ma, C.; Yang, T.; Wang, D. Evaluation of riboflavin photochemical treatment for inactivation of HCT116 tumor cells mixed in simulative intraoperative salvage blood. *Transfusion* **2019**, *59*, 3205–3213.
21. Zhai, B.; Sun, X.Y. Controversy over the use of intraoperative blood salvage autotransfusion during liver transplantation for hepatocellular carcinoma patients. *World J. Gastroenterol.* **2013**, *19*, 3371–3374.
22. Kumar, N.; Chen, Y.; Zaw, A.S.; Nayak, D.; Ahmed, Q.; Soong, R.; Wong, H.K. Use of intraoperative cell-salvage for autologous blood transfusions in metastatic spine tumour surgery: a systematic review. *Lancet Oncol.* **2014**, *15*, e33–41.
23. Ferroni, M.C.; Correa, A.F.; Lyon, T.D.; Davies, B.J.; Ost, M.C. The use of intraoperative cell salvage in urologic oncology. *Rev. Urol.* **2017**, *19*, 89–96.
24. Kumar, N.; Ravikumar, N.; Tan, J.Y.H.; Akbary, K.; Patel, R.S.; Kannan, R. Current Status of the Use of Salvaged Blood in Metastatic Spine Tumour Surgery. *Neurospine.* **2018**, *15*, 206–215.
25. Frietsch, T.; Steinbicker, A.U.; Horn, A.; Metz, M.; Dietrich, G.; Weigand, M.A.; Waters, J.H.; Fischer, D. Safety of Intraoperative Cell Salvage in Cancer Surgery: An Updated Meta-Analysis of the Current Literature. *Transfus. Med. Hemother* **2022**, *49*, 143–157.
